# Supplementary material
Source: publisher figshare collection journal article supplement (https://tandf.figshare.com/ndownloader/files/13085111)
Supplement: Supplementary file 1 [file 13085111]

**Supporting information**

**-for-**

**Effect of (H2O)*n* (*n* = 1-3) Clusters on H2O2 + HO → HO2 + H2O Reaction in Tropospheric Conditions: Competition Between One-step and Stepwise Routes**†

Tianlei Zhang[[1]](#footnote-2), Xinguang Lan, Yuhang Zhang, Rui Wang, Yongqi Zhang,

Zhangyu Qiao, Na Li

*Institute of Theoretical and Computational Chemistry, Shaanxi Key Laboratory of Catalysis, Shaanxi University of Technology, Hanzhong, Shaanxi 723001, P. R. China;*

**Table S1** Rate constants (cm3molecules-1s-1) for the H2O + HO2 formation from the H2O2 + HO reaction within the temperature range of 240 - 425 Ka

| *T*/K | Keq |  | *K*R | *k*exp |
| --- | --- | --- | --- | --- |
| 240 | 4.26E-19 | 3.38E+07 | 1.44E-11 |  |
| 250 | 2.28E-19 | 5.80E+07 | 1.32E-11 |  |
| 278 | 5.03E-20 | 2.13E+08 | 1.07E-11 |  |
| 288 | 3.15E-20 | 3.18E+08 | 1.00E-11 |  |
| 298 | 2.04E-20 | 4.61E+08 | 9.42E-12 | (1.70E-12)b |
| 308 | 1.36E-20 | 6.52E+08 | 8.87E-12 |  |
| 325 | 7.23E-21 | 1.11E+09 | 8.04E-12 | (1.72±0.12 E-12) c |
| 375 | 1.59E-21 | 4.46E+09 | 7.08E-12 |  |
| 425 | 5.04E-22 | 1.02E+10 | 5.13E-12 |  |

a *k*R is the rate constant of the process of H2O2 + HO → IM1 → TS1 → H2O + HO2

b Value was from Ref. [[1](#_ENREF_1)]

c Value was from Ref. [[2](#_ENREF_2)]


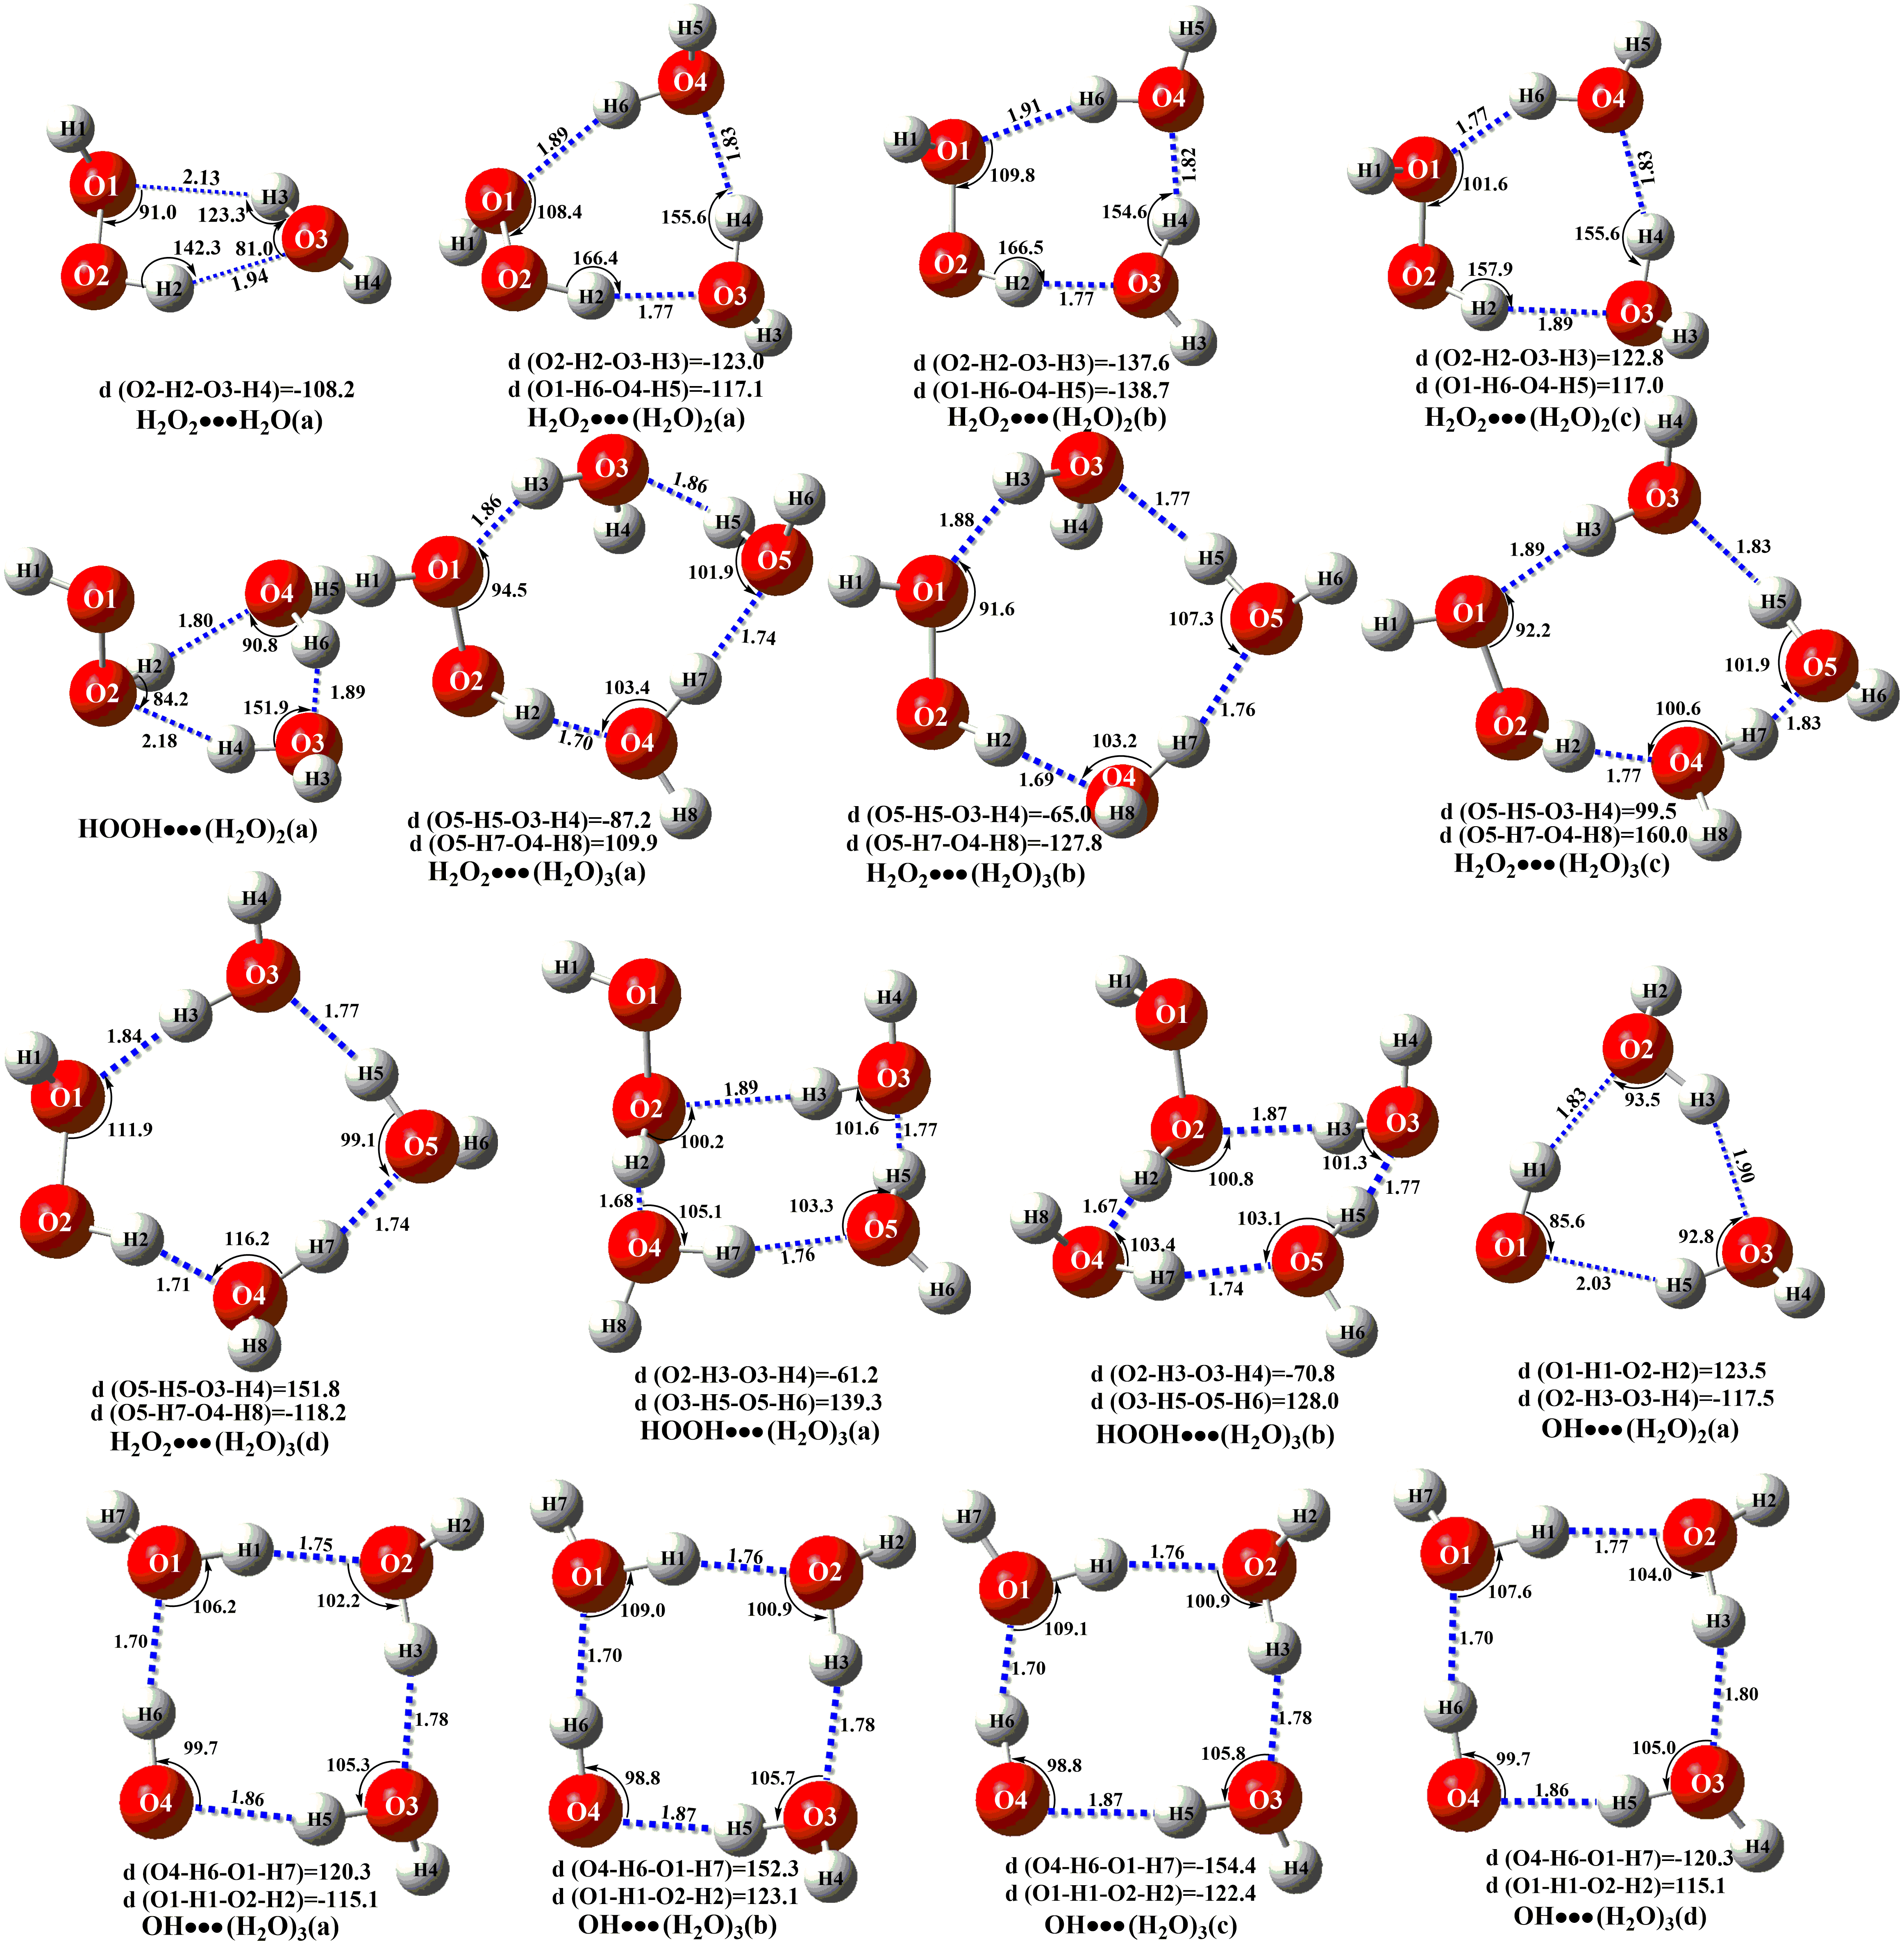


**Fig. S1** The optimized geometrical complexes between H2O2 (HO) radical and (H2O)*n* (*n*= 1-3) at the M06-2X/aug-cc-pVTZ level of theory (bond length Å, bond angle °)

**Table S2** Equilibrium constants and concentration of H2O2•••(H2O)*n* (*n* = 1-3) and HO•••(H2O)*n* (*n* = 1-3)) complexesa,b,c

| *T/K* | H2O2•••H2O | | H2O2•••H2O(a) | | H2O•••HO | | H2O2•••(H2O)2 | | H2O2•••(H2O)2(a) | | H2O2•••(H2O)2(b) | |
| --- | --- | --- | --- | --- | --- | --- | --- | --- | --- | --- | --- | --- |
| 240 | 1.73E-20 | | 9.52E-21 | | 6.07E-20 | | 2.00E-17 | | 1.84E-17 | | 1.16E-17 | |
| 250 | 1.11E-20 | | 6.28E-21 | | 4.30E-20 | | 8.29E-18 | | 7.50E-18 | | 4.84E-18 | |
| 278 | 3.78E-21 | | 2.32E-21 | | 1.90E-20 | | 9.92E-19 | | 8.56E-19 | | 5.87E-19 | |
| 288 | 2.72E-21 | | 1.71E-21 | | 1.48E-20 | | 5.15E-19 | | 4.38E-19 | | 3.06E-19 | |
| 298 | 2.01E-21 | | 1.29E-21 | | 1.17E-20 | | 2.80E-19 | | 2.34E-19 | | 1.67E-19 | |
| 298 | (9.88E+06)c | | (1.54E+06)c | | (8.95E+04)c | | (1.28E+04)c | | (1.08E+04)c | | (7.66E+03)c | |
| 308 | 1.52E-21 | | 9.96E-22 | | 9.45E-21 | | 1.58E-19 | | 1.31E-19 | | 9.47E-20 | |
| 325 | 9.80E-22 | | 6.66E-22 | | 6.78E-21 | | 6.54E-20 | | 5.29E-20 | | 3.93E-20 | |
| 375 | 3.51E-22 | | 2.59E-22 | | 3.12E-21 | | 7.88E-21 | | 6.06E-21 | | 4.78E-21 | |
| 425 | 1.65E-22 | | 1.31E-22 | | 1.77E-21 | | 1.60E-21 | | 1.18E-21 | | 9.81E-22 | |
| *T/K* | H2O2•••(H2O)2(c) | HOOH•••(H2O)2 | | HOOH•••(H2O)2(a) | | HO•••(H2O)2 | | HO•••(H2O)2(a) | | H2O2•••(H2O)3 | |  |
| 240 | 1.79E-17 | 2.16E-19 | | 1.49E-19 | | 5.43E-18 | | 6.07E-20 | | 2.18E-16 | |  |
| 250 | 7.26E-18 | 1.06E-19 | | 7.36E-20 | | 2.72E-18 | | 4.30E-20 | | 8.80E-17 | |  |
| 278 | 8.30E-19 | 1.93E-20 | | 1.35E-20 | | 5.10E-19 | | 1.90E-20 | | 9.85E-18 | |  |
| 288 | 4.24E-19 | 1.14E-20 | | 7.98E-21 | | 3.04E-19 | | 1.48E-20 | | 5.00E-18 | |  |
| 298 | 2.27E-19 | 6.97E-21 | | 4.90E-21 | | 1.88E-19 | | 1.17E-20 | | 2.66E-18 | |  |
| 298 | (1.04E+04)c | (3.20E+02)c | | (2.25E+02)c | | (8.63E-02)c | | (5.38E-03)c | | (3.17E+02)c | |  |
| 308 | 1.27E-19 | 4.42E-21 | | 3.11E-21 | | 1.20E-19 | | 9.45E-21 | | 1.47E-18 | |  |
| 325 | 5.14E-20 | 2.18E-21 | | 1.54E-21 | | 5.96E-20 | | 6.78E-21 | | 5.86E-19 | |  |
| 375 | 5.89E-21 | 4.02E-22 | | 2.87E-22 | | 1.12E-20 | | 3.12E-21 | | 6.37E-20 | |  |
| 425 | 1.15E-21 | 1.13E-22 | | 8.15E-23 | | 3.18E-21 | | 1.77E-21 | | 1.17E-20 | |  |
| *T/K* | H2O2•••(H2O)3(a) | H2O2•••(H2O)3(b) | | H2O2•••(H2O)3 (c) | | H2O2•••(H2O)3(d) | | HOOH•••(H2O)3 | | HOOH•••(H2O)3(a) | |  |
| 240 | 6.83E-17 | 3.52E-17 | | 1.83E-17 | | 2.14E-17 | | 9.91E-18 | | 6.39E-18 | |  |
| 250 | 2.90E-17 | 1.53E-17 | | 8.37E-18 | | 9.85E-18 | | 4.15E-18 | | 2.71E-18 | |  |
| 278 | 3.68E-18 | 2.07E-18 | | 1.29E-18 | | 1.54E-18 | | 5.11E-19 | | 3.45E-19 | |  |
| 288 | 1.95E-18 | 1.12E-18 | | 7.22E-19 | | 8.69E-19 | | 2.68E-19 | | 1.83E-19 | |  |
| 298 | 1.08E-18 | 6.30E-19 | | 4.23E-19 | | 5.11E-19 | | 1.47E-19 | | 1.01E-19 | |  |
| 298 | (1.29E+02)c | (7.51E+01)c | | (5.04E+01)c | | (6.09E+01)c | | (1.75E+01)c | | (1.20E+01)c | |  |
| 308 | 6.23E-19 | 3.69E-19 | | 2.57E-19 | | 3.12E-19 | | 8.40E-20 | | 5.83E-20 | |  |
| 325 | 2.65E-19 | 1.61E-19 | | 1.19E-19 | | 1.45E-19 | | 3.52E-20 | | 2.48E-20 | |  |
| 375 | 3.45E-20 | 2.23E-20 | | 1.88E-20 | | 2.33E-20 | | 4.40E-21 | | 3.21E-21 | |  |
| 425 | 7.48E-21 | 5.08E-21 | | 4.77E-21 | | 5.97E-21 | | 9.23E-22 | | 6.94E-22 | |  |
| *T/K* | HOOH•••(H2O)3(b) | HO•••(H2O)3 | | HO•••(H2O)3 (a) | | HO•••(H2O)3 (b) | | HO•••(H2O)3 (c) | | HO•••(H2O)3 (d) | |  |
| 240 | 2.30E-16 | 2.59E-16 | | 2.44E-16 | | 1.51E-16 | | 1.08E-16 | | 1.27E-18 | |  |
| 250 | 9.12E-17 | 1.19E-16 | | 1.12E-16 | | 7.22E-17 | | 5.20E-17 | | 6.64E-19 | |  |
| 278 | 9.84E-18 | 1.82E-17 | | 1.73E-17 | | 1.23E-17 | | 8.91E-18 | | 1.39E-19 | |  |
| 288 | 4.95E-18 | 1.02E-17 | | 9.72E-18 | | 7.12E-18 | | 5.16E-18 | | 8.53E-20 | |  |
| 298 | 2.61E-18 | 5.96E-18 | | 5.68E-18 | | 4.28E-18 | | 3.11E-18 | | 5.42E-20 | |  |
| 298 | (3.11E+01)c | (7.10E-01)c | | (6.77E-01)c | | (5.10E-01)c | | (3.70E-01)c | | (6.46E-03)c | |  |
| 308 | 1.44E-18 | 3.60E-18 | | 3.43E-18 | | 2.66E-18 | | 1.93E-18 | | 3.54E-20 | |  |
| 325 | 5.70E-19 | 1.64E-18 | | 1.57E-18 | | 1.27E-18 | | 9.26E-19 | | 1.83E-20 | |  |
| 375 | 6.23E-20 | 2.51E-19 | | 2.41E-19 | | 2.16E-19 | | 1.59E-19 | | 3.70E-21 | |  |
| 425 | 1.18E-20 | 6.08E-20 | | 5.87E-20 | | 5.70E-20 | | 4.19E-20 | | 1.10E-21 | |  |

aEquilibrium constants in units of cm3⋅molecule−1;

bAll equilibrium constants were calculated by using energies computed at CCSD(T)/CBS level and partition functions obtained at M06-2X/aug-cc-pVTZ level.

c The concentration of the corresponding complexes at 298 K

d Equilibrium constants of H2O2•••H2O and H2O•••HO are in good agreement with previous report [3](#_ENREF_3).

They were calculated using the equation as follows:

The various Q values denote the partition functions of the complexes (such as: H2O2•••H2O, H2O2•••(H2O)2), and reactants R, respectively. All partition functions were obtained using the M06-2X/aug-cc-pVTZ method. ER, and Ecomplex stand for the energies of the species of complex and R, respectively,  is the symmetry factor. The corresponding equation for calculating the concentration is as follows：

[(H2O)2] = Keq((H2O)2) [H2O]2

[(H2O)3] = Keq((H2O)3) [H2O] [(H2O)2] = Keq((H2O)3) Keq((H2O)2) [H2O]3

[H2O2•••H2O]=Keq(H2O2•••H2O) [H2O2] [H2O]

[H2O2•••(H2O)2] = Keq(H2O2•••(H2O)2) [H2O2] [(H2O)2]

[H2O2•••(H2O)3] = Keq(H2O2•••(H2O)3) [H2O2] [(H2O)3]


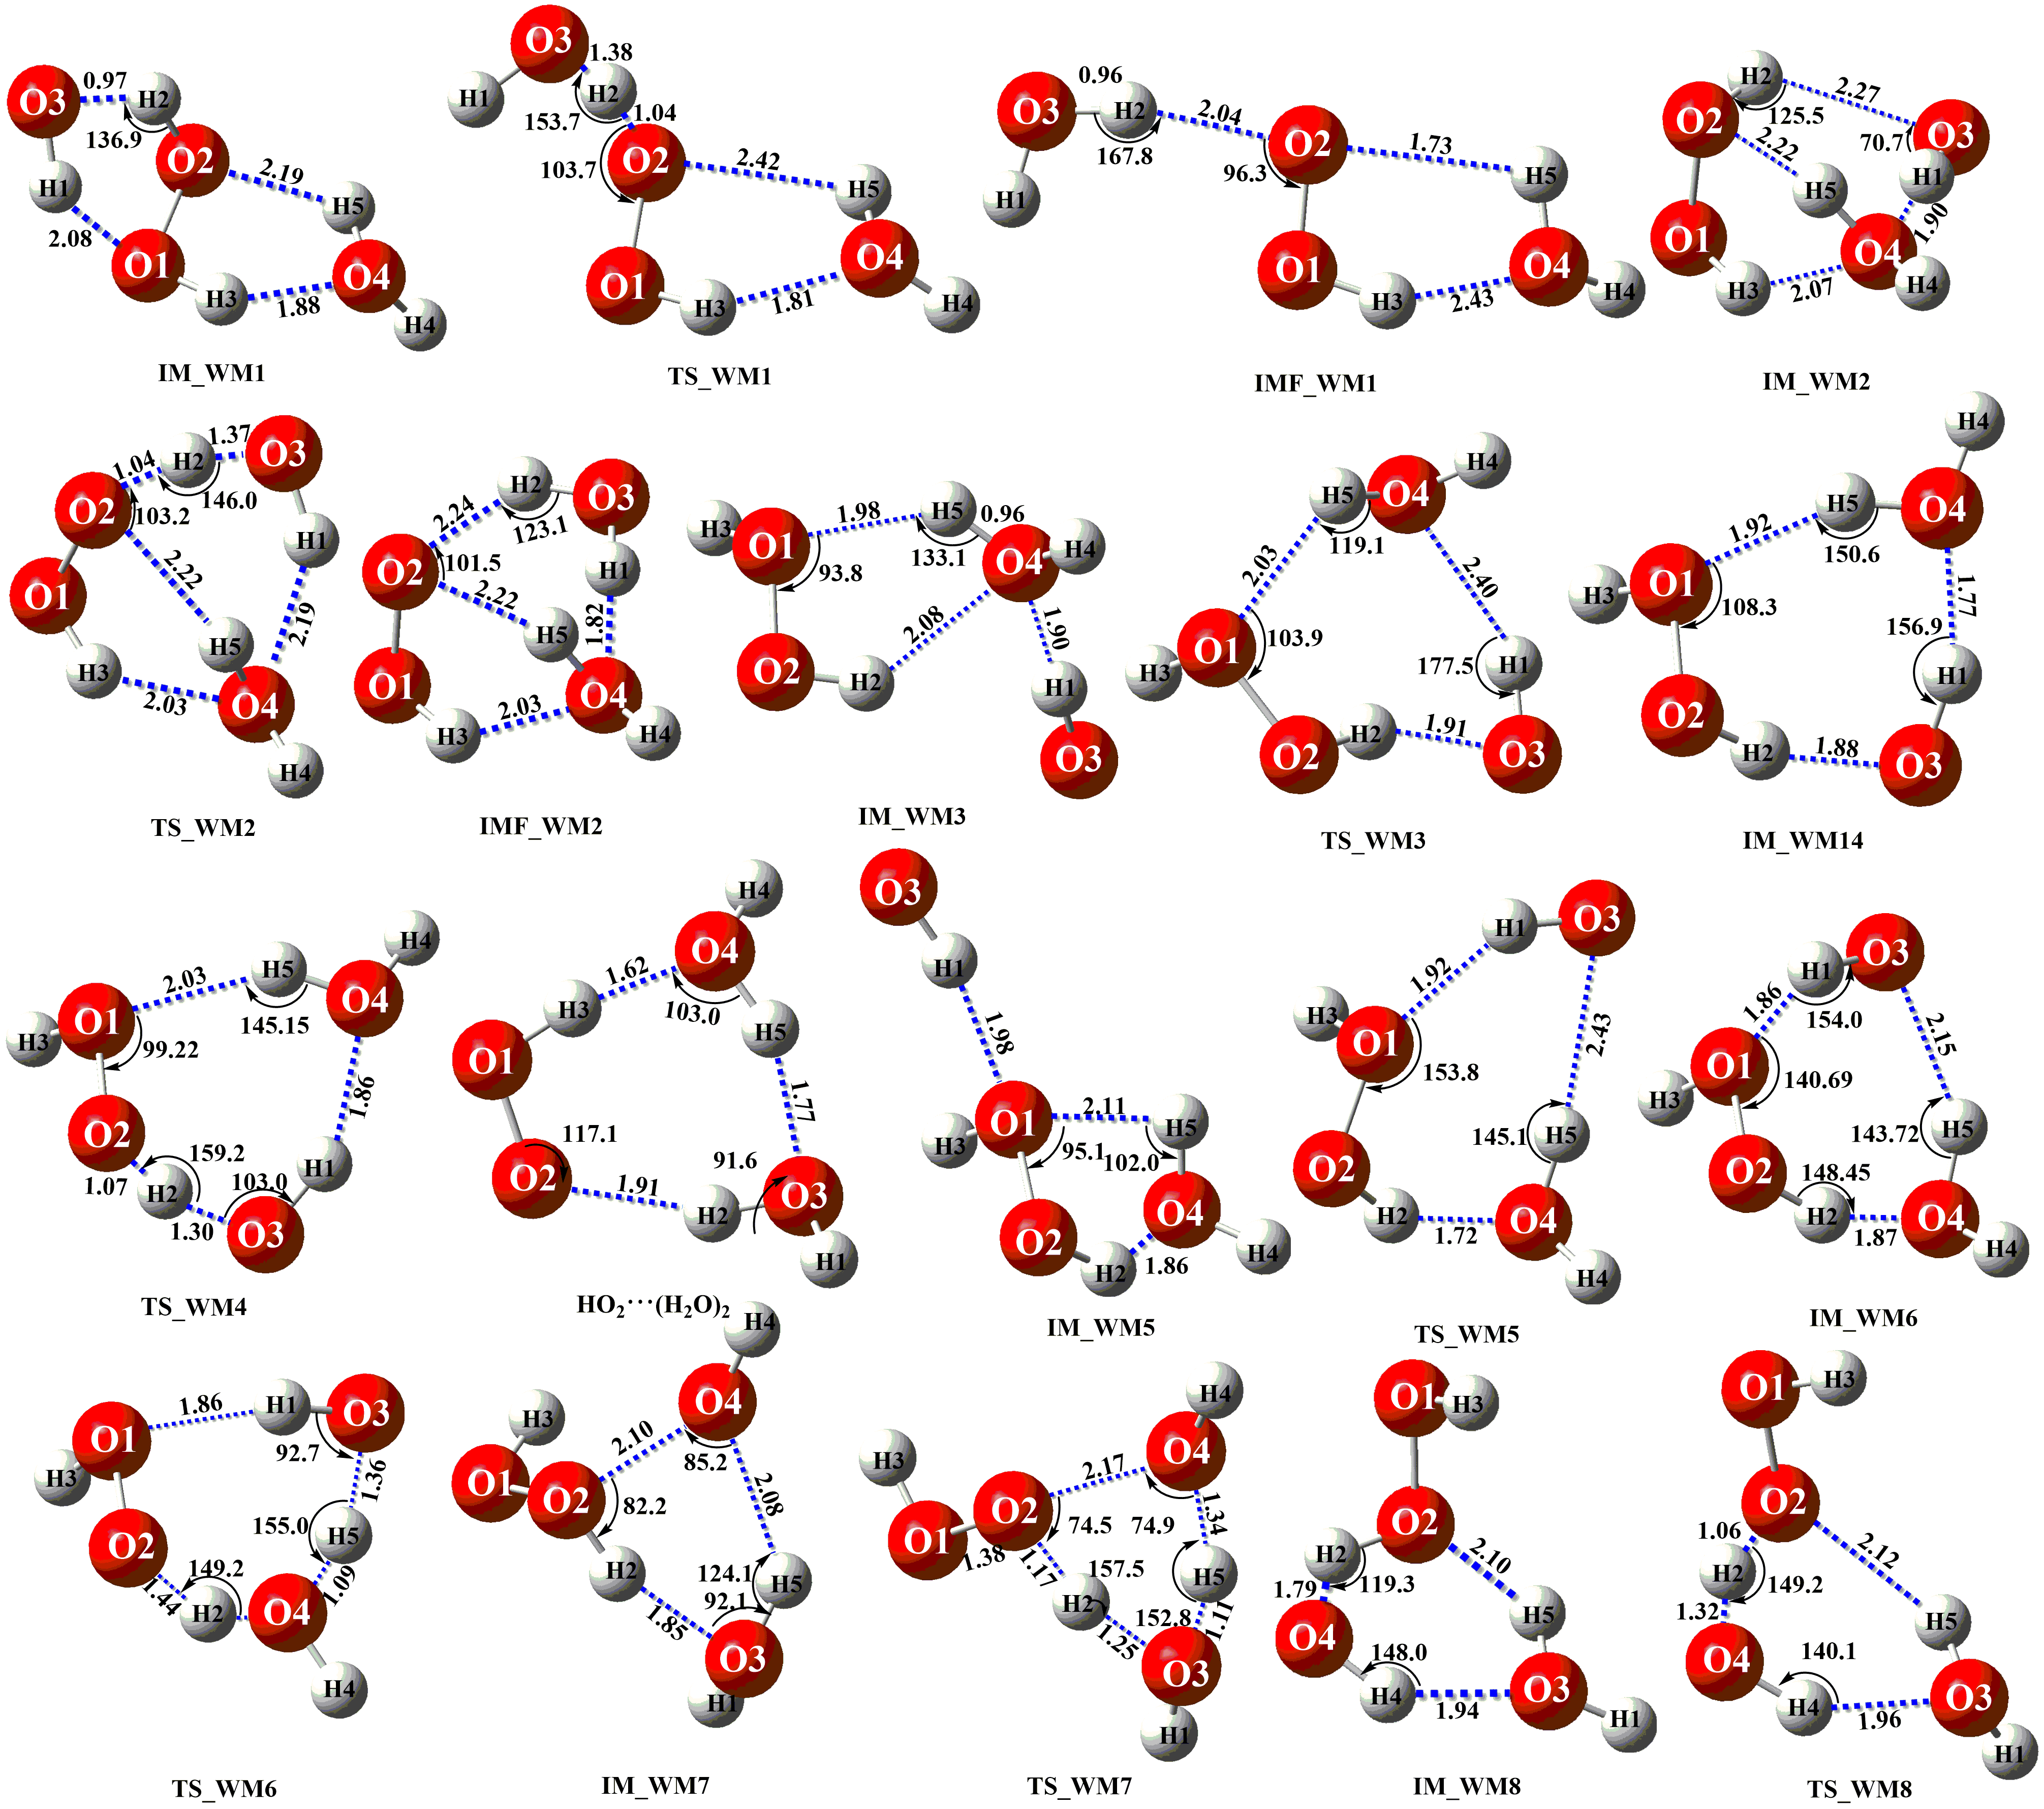


**Fig. S2** The geometrical structures of the optimized intermediates and transitions state in H2O2•••H2O + HO and H2O•••HO + H2O2 reactions (bond length Å, bond angle °) at the M06-2X/aug-cc-pVTZ level

**
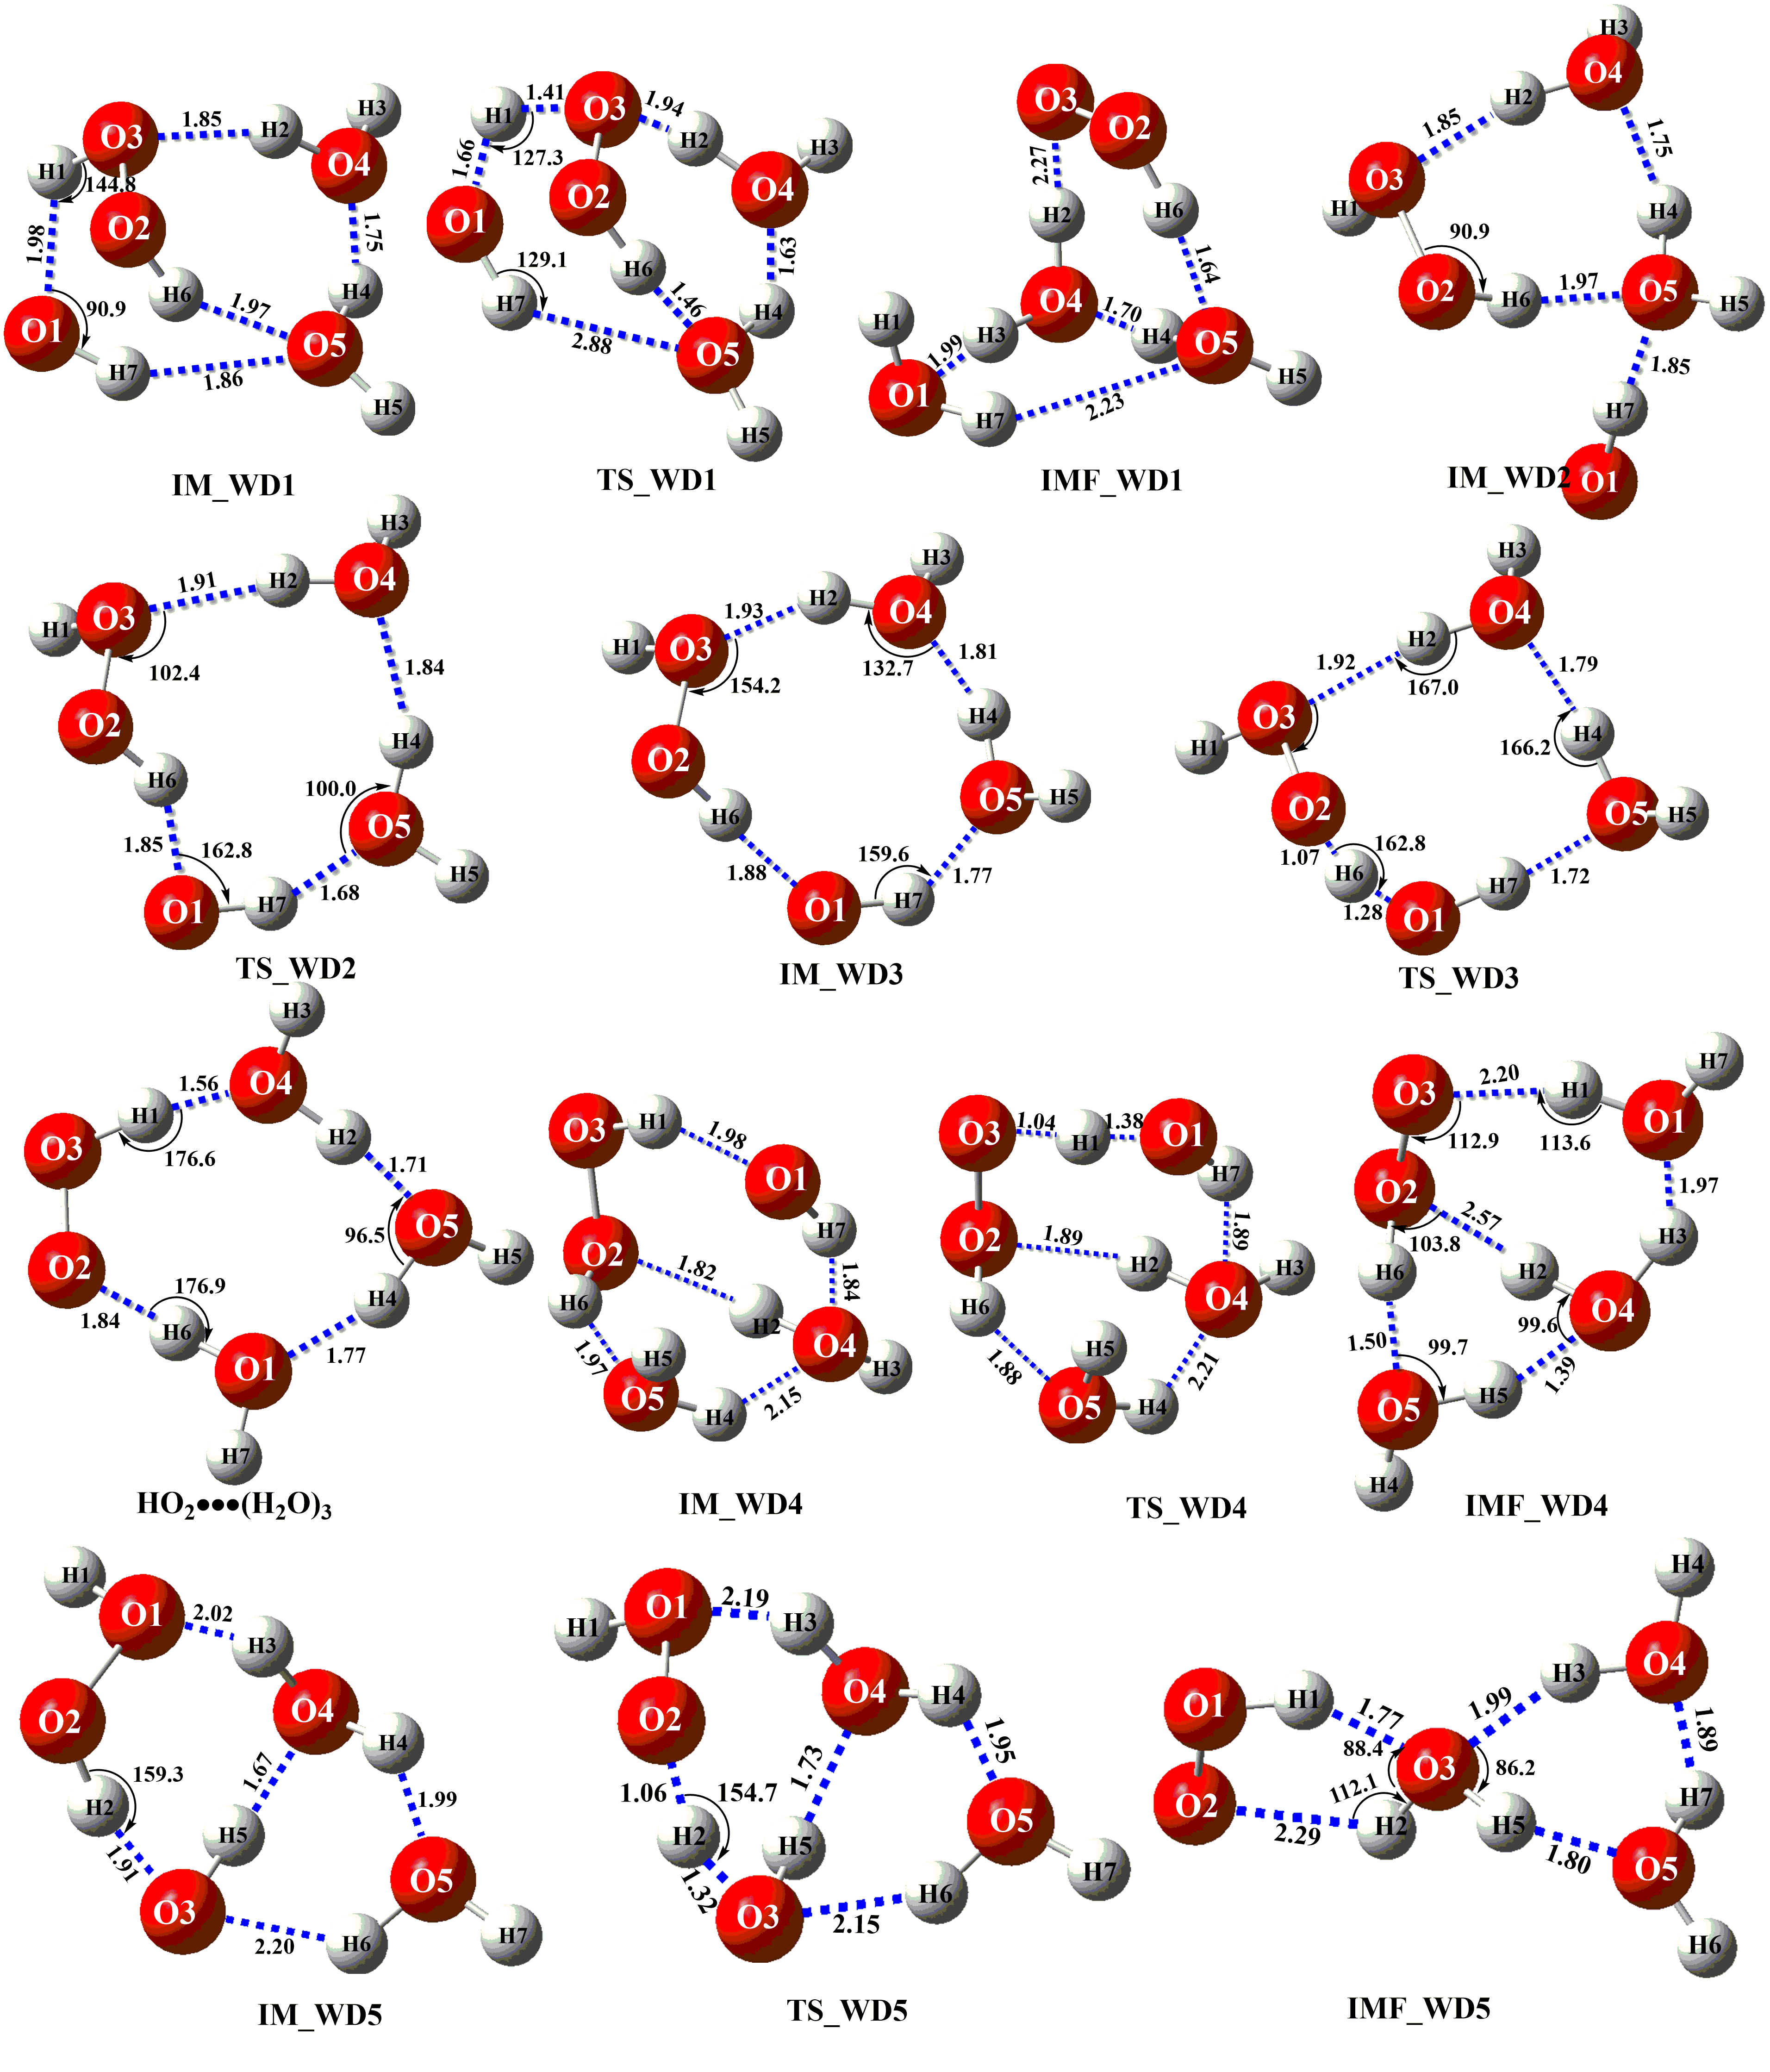
**

**Fig. S3** The geometrical structures of the optimized intermediates and transitions state in H2O2•••(H2O)2 + HO and HO•••(H2O)2 + H2O2 reactions at the M06-2X/aug-cc-pVTZ level


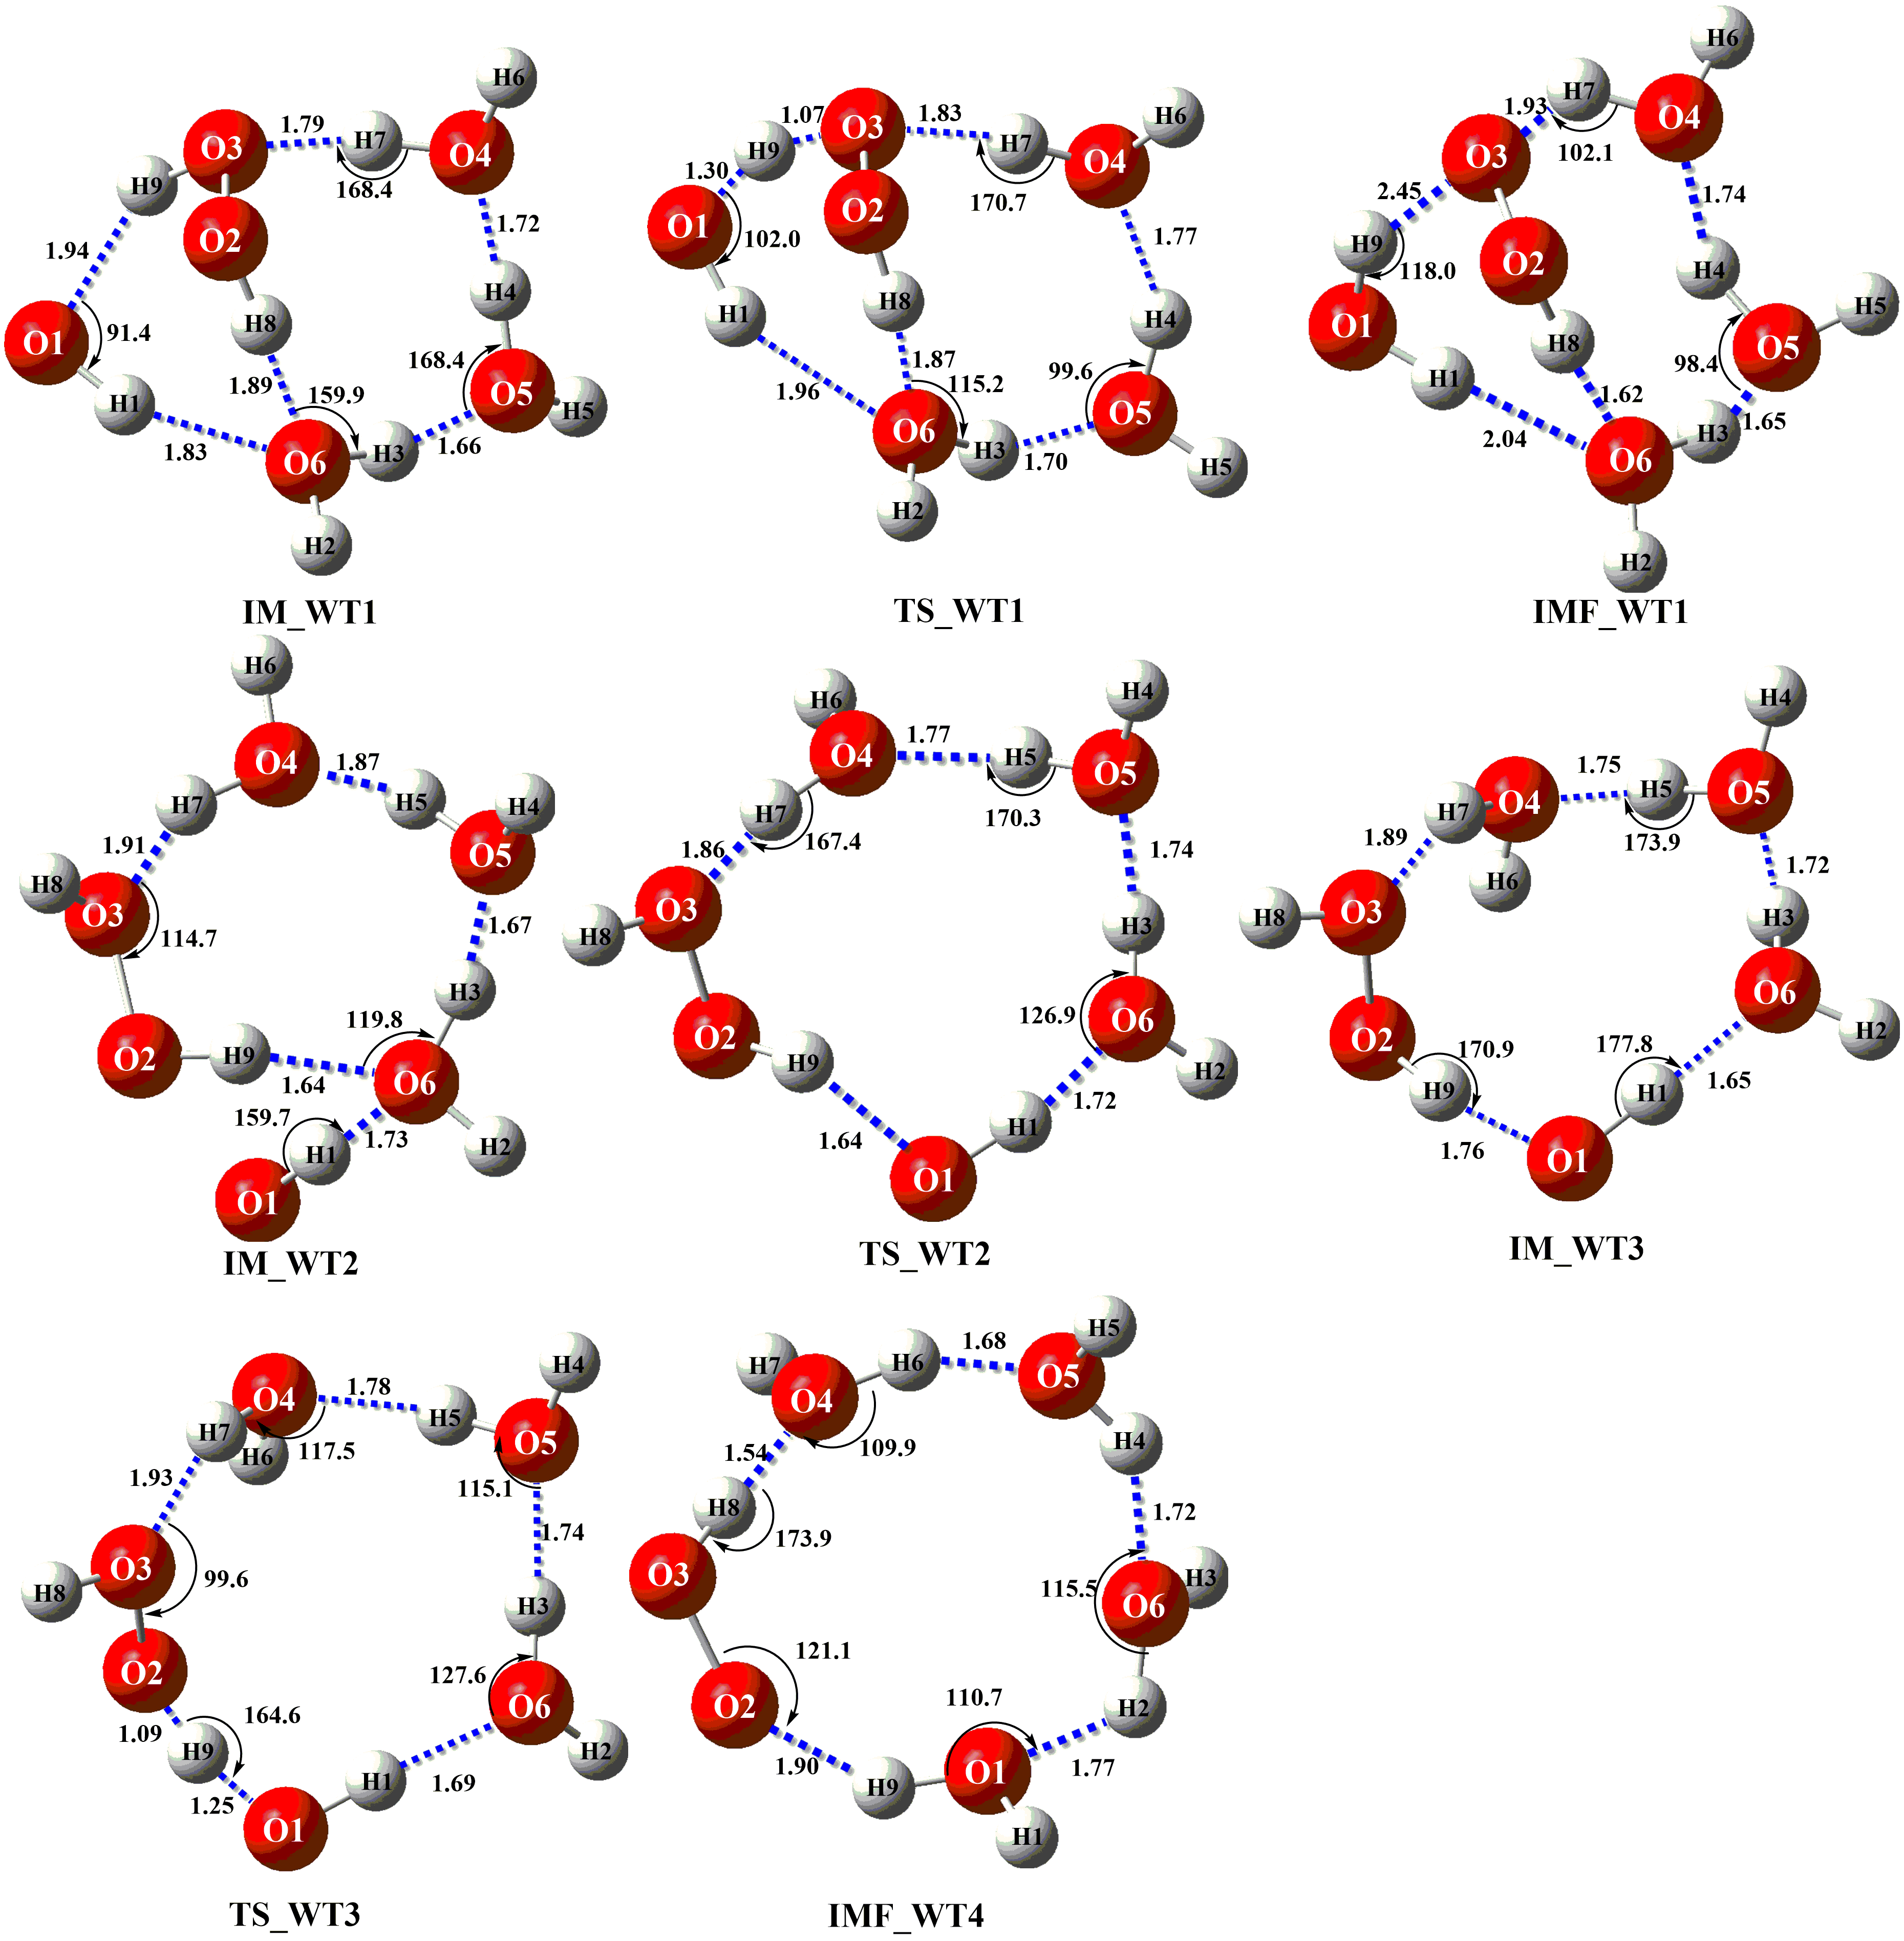


**Fig. S4** The geometrical structures of the optimized intermediates and transitions state in H2O2•••(H2O)3 + HO reaction at the M06-2X/aug-cc-pVTZ level

**
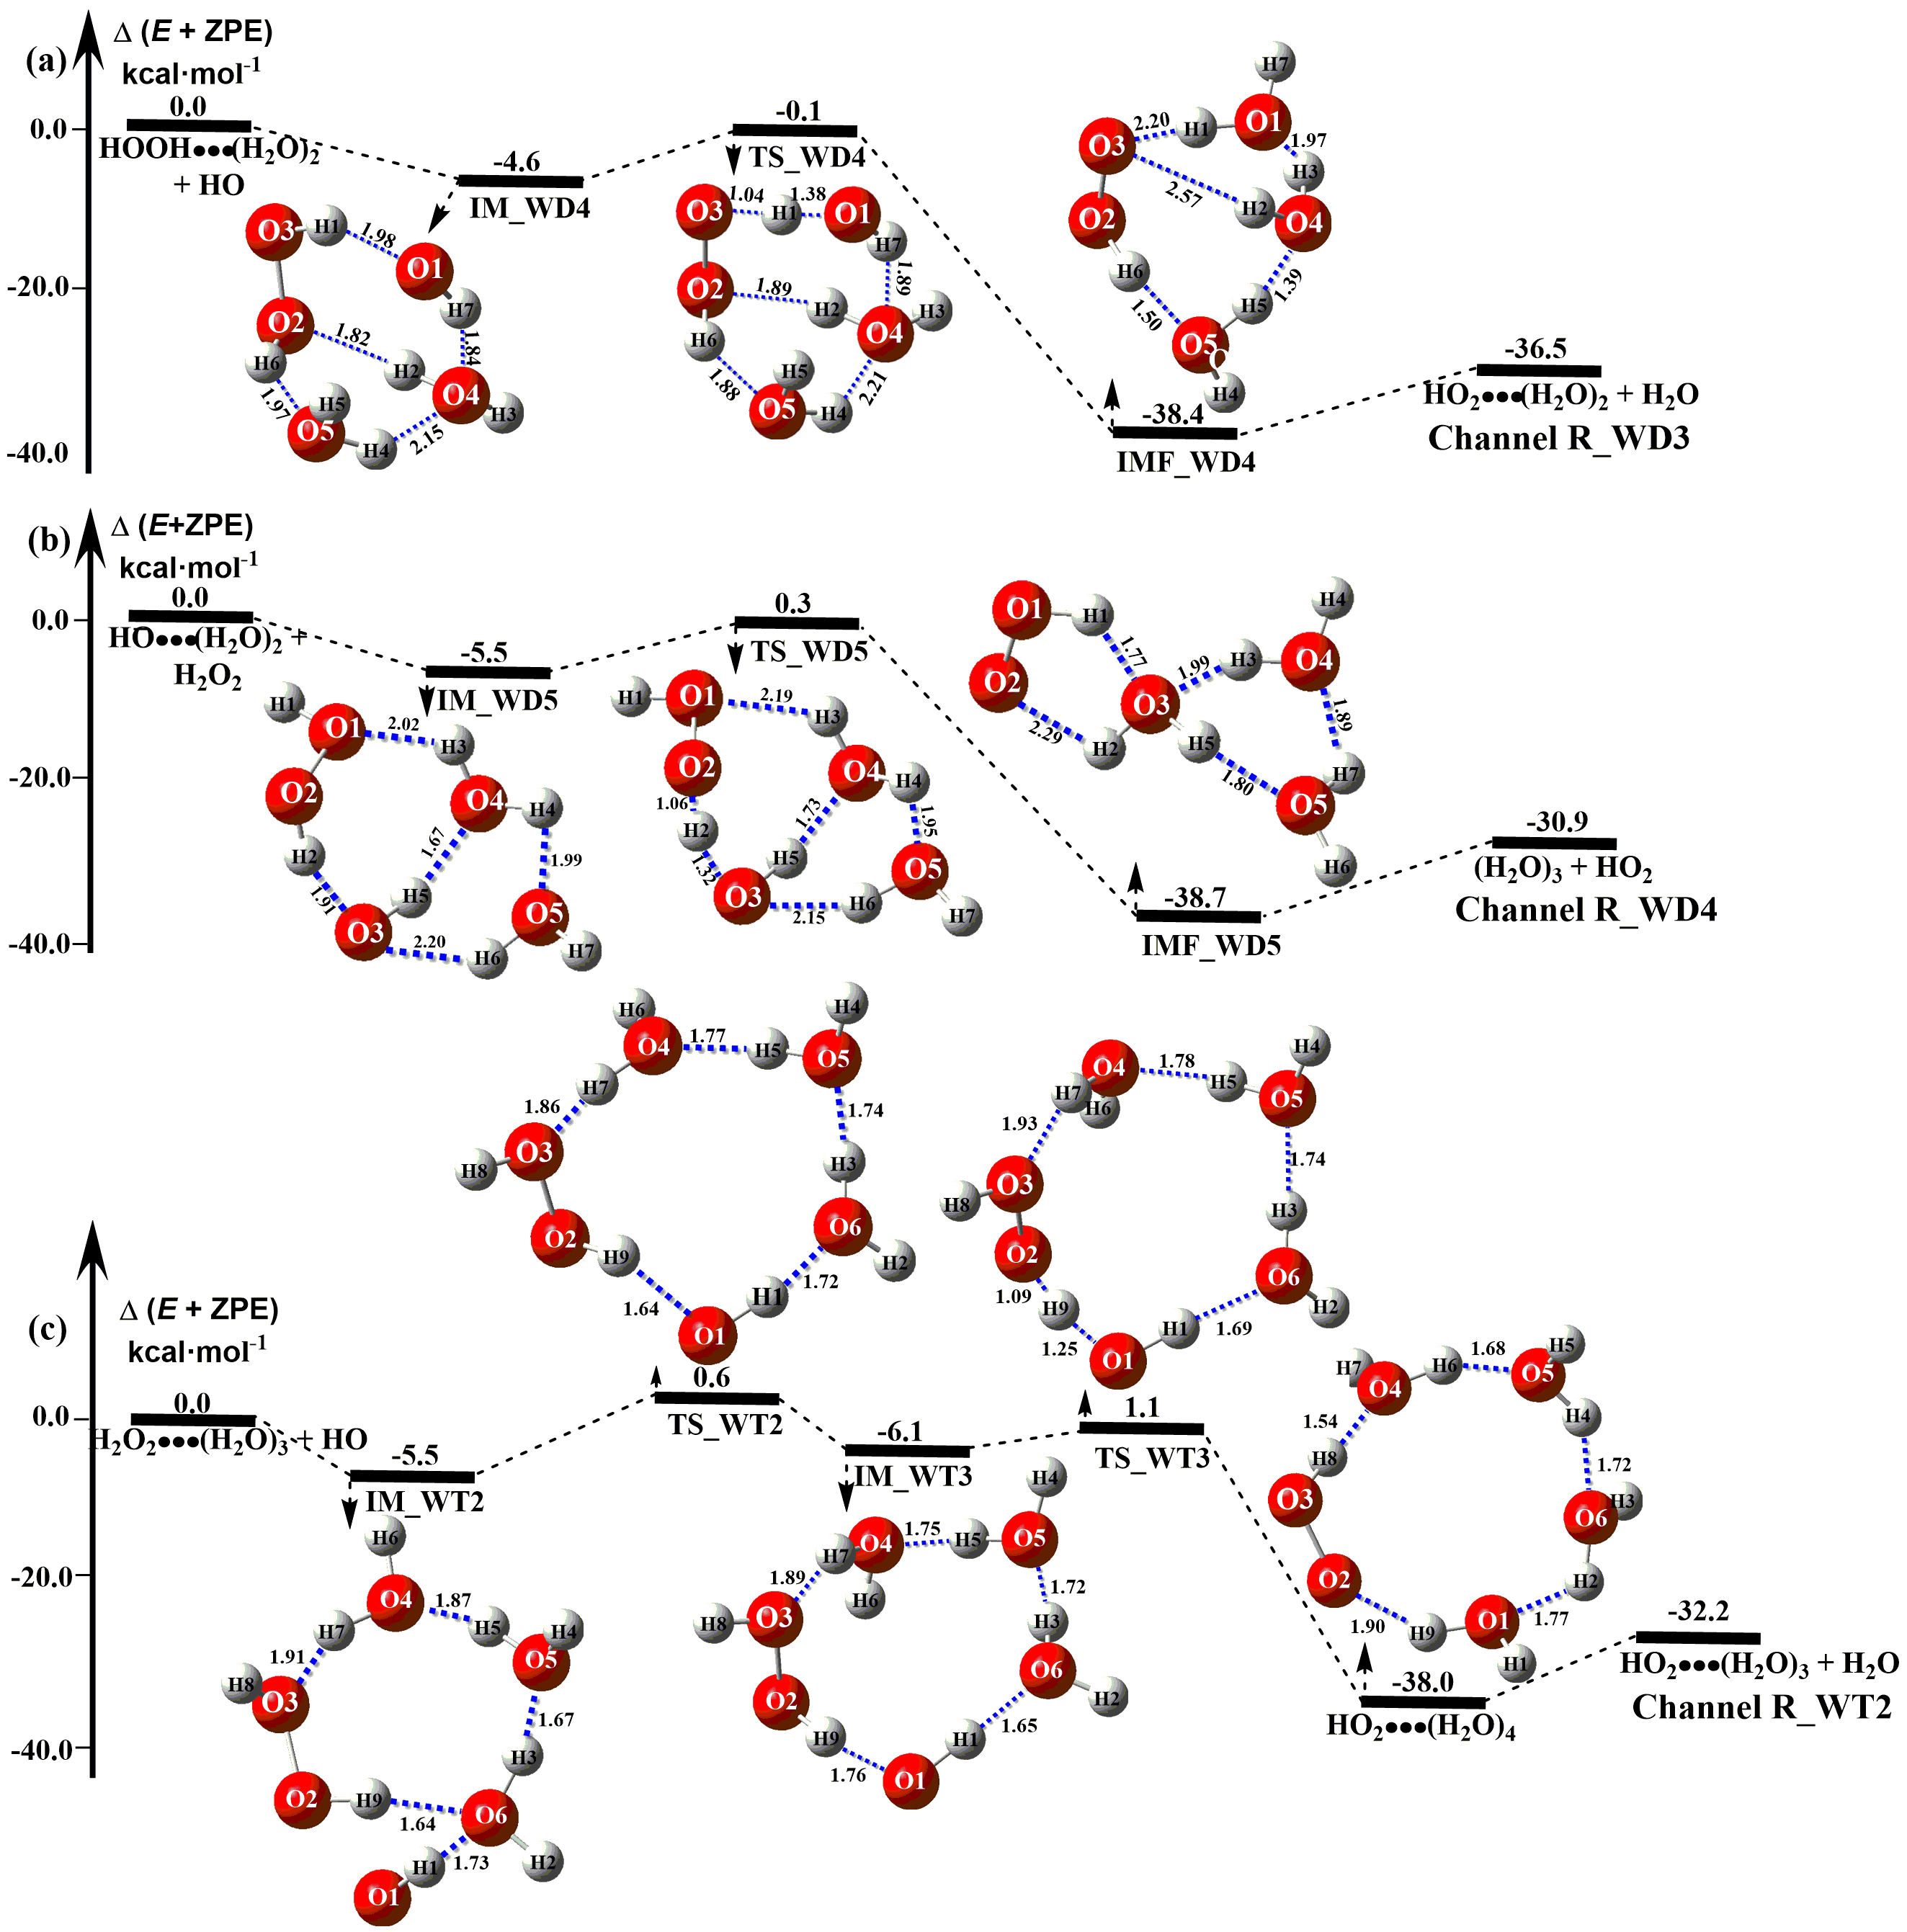
**

**Fig. S5** Schematic energy diagrams of unfavorable channels involved in (H2O)*n* (*n* = 1-3)-catalyzed H2O2 + HO → HO2 + H2O reaction at the CCSD(T)/CBS//M06-2X/aug-cc-pVTZ level

**Table S3** Zero point energy (ZPE/(kcalmol-1)), entropies (S/ (cal·mol-1·K-1)), relative energies Δ*E* and Δ(*E+*ZPE)/(kcalmol-1)), enthalpies (Δ*H*(298)/(kcalmol-1)), and free energies (Δ*G*(298)/(kcalmol-1)) for the complexes

| Species | ZPE | S | Δ*E* | Δ*H* | Δ*G* | Δ(*E* + ZPE) |
| --- | --- | --- | --- | --- | --- | --- |
| H2O2 + H2O | 30.5 | 100.7 | 0.0 | 0.0 | 0.0 | 0.0 |
| H2O2•••H2O | 33.1 | 72.2 | -6.8 | -5.8 | 2.7 | -4.3 |
| H2O2•••H2O(a) | 33.1 | 72.2 | -6.8 | -5.8 | 2.7 | -4.3 |
| HO + H2O | 18.9 | -152.0 | 0.0 | 0.0 | 0.0 | 0.0 |
| H2O•••HO | 20.9 | 66.8 | -5.2 | -4.5 | 1.7 | -3.2 |
| H2O2 + (H2O)2 | 46.3 | 124.3 | 0.0 | 0.0 | 0.0 | 0.0 |
| H2O2•••(H2O)2 | 49.2 | 85.5 | -10.8 | -10.2 | -15.9 | -8.0 |
| H2O2•••(H2O)2 (a) | 49.1 | 85.9 | -10.1 | -9.9 | -15.8 | -7.4 |
| H2O2•••(H2O)2 (b) | 49.2 | 85.5 | -10.6 | -10.2 | -16.0 | -7.8 |
| H2O2•••(H2O)2 (c) | 49.1 | 85.9 | -10.1 | -9.9 | -15.8 | -7.4 |
| HOOH•••(H2O)2 | 49.2 | 85.7 | -8.3 | -8.0 | -13.7 | -5.4 |
| HOOH•••(H2O)2 (a) | 49.1 | 85.7 | -6.1 | -6.4 | -12.2 | -3.4 |
| HO + (H2O)2 | 34.7 | 111.2 | 0.0 | 0.0 | 0.0 | 0.0 |
| HO•••(H2O)2 | 37.3 | 80.2 | -7.8 | -4.6 | -15.8 | -5.2 |
| HO•••(H2O)2 (a) | 37.3 | 80.2 | -7.8 | -4.6 | -15.8 | -5.2 |
| H2O2 + (H2O)3 | 63.1 | 135.4 | 0.0 | 0.0 | 0.0 | 0.0 |
| H2O2•••(H2O)3 | 64.8 | 100.5 | -12.7 | -11.5 | -1.1 | -10.9 |
| H2O2•••(H2O)3(a) | 63.9 | 101.4 | -12.5 | -11.4 | -1.1 | -10.8 |
| H2O2•••(H2O)3(b) | 64.8 | 101.6 | -11.9 | -10.7 | -0.6 | -10.2 |
| H2O2••• (H2O)3(c) | 64.8 | 101.5 | -11.4 | -10.8 | -0.7 | -10.5 |
| H2O2•••(H2O)3(d) | 64.5 | 101.6 | -10.8 | -9.7 | 0.0 | -9.4 |
| HOOH•••(H2O)3 | 64.8 | 101.6 | -12.1 | -10.8 | -0.8 | -10.3 |
| HOOH•••(H2O)3(a) | 64.8 | 101.4 | -11.9 | -10.7 | -0.5 | -10.2 |
| HOOH•••(H2O)3(b) | 64.5 | 102.9 | -10.8 | -9.6 | -0.1 | -9.3 |
| HO + (H2O)3 | 51.4 | 122.3 | 0.0 | 0.0 | 0.0 | 0.0 |
| HO•••(H2O)3 | 53.3 | 93.4 | -11.0 | -9.8 | -1.2 | -9.1 |
| HO•••(H2O)3(a) | 53.3 | 93.4 | -10.9 | -9.8 | -1.1 | -8.9 |
| HO•••(H2O)3(b) | 53.3 | 94.5 | -10.3 | -9.3 | -1.0 | -8.4 |
| HO•••(H2O)3(c) | 53.4 | 93.9 | -10.4 | -9.2 | -0.8 | -8.5 |
| HO•••(H2O)3(d) | 54.2 | 88.9 | -9.6 | -8.3 | 1.6 | -6.8 |

*a* ZPE and *S* values obtained at M06-2X/aug-cc-pVTZ level of theory; The energy values are obtained at CCSD(T)/CBS level whereas the *H* and *G* corrections are taken from the M06-2X/aug-cc-pVTZ level.

**Table S4** Zero-point energy (ZPE/(kcalmol-1)), relative energies (Δ*E* and Δ(*E+*ZPE)/(kcalmol-1)), enthalpies (Δ*H*(298)/(kcalmol-1)), and free energies (Δ*G*(298)/(kcalmol-1)) for water-assisted H2O2 + HO → HO2 + H2O reaction

| System | ZPE | S | △*G* | △*E* | △*H* | △*G* | △(*E* + ZPE) |
| --- | --- | --- | --- | --- | --- | --- | --- |
| H2O2•••H2O + HO | 38.4 | 114.8 | 0.0 | 0.0 | 0.0 | 0.0 | 0.0 |
| IM_WM1 | 40.3 | 86.0 | 3.7 | -4.6 | -4.9 | 3.7 | -2.9 |
| TS_WM1 | 37.1 | 86.5 | 8.5 | 2.1 | 0.1 | 8.5 | 0.7 |
| IMF_WM1 | 40.4 | 93.0 | -28.6 | -37.1 | -35.1 | -28.6 | -35.1 |
| IM_WM2 | 41.1 | 87.2 | 3.9 | -6.9 | -3.5 | 3.9 | -4.1 |
| TS_WM2 | 37.9 | 81.8 | 8.6 | 0.4 | -1.2 | 8.6 | -0.1 |
| (H2O)2•••HO2 | 40.3 | 82.7 | -25.4 | -47.7 | -34.1 | -25.4 | -44.6 |
| 2H2O + HO2 | 36.2 | 144.7 | -33.6 | -24.9 | -24.7 | -33.6 | -27.1 |
| IM_WM3 | 39.8 | 86.8 | 3.5 | -5.5 | -4.9 | 3.5 | -4.1 |
| IM_WM4 | 40.2 | 87.0 | 0.6 | -8.8 | -7.7 | 0.6 | -7.1 |
| TS_WM3 | 40.2 | 81.6 | 11.7 | 1.6 | 1.8 | 11.7 | 3.4 |
| TS_WM4 | 36.9 | 83.2 | 7.5 | 0.8 | -1.9 | 7.5 | -0.8 |
| (H2O)2•••HO2 | 40.3 | 82.7 | -25.4 | -47.7 | -34.1 | -25.4 | -44.6 |
| IM_WM5 | 40.9 | 82.9 | 4.5 | -6.0 | -4.4 | 4.5 | -3.6 |
| IM_WM6 | 40.7 | 81.9 | 1.4 | -11.0 | -8.4 | 1.4 | -7.0 |
| TS_WM5 | 40.3 | 79.4 | 12.0 | 1.3 | 1.4 | 12.0 | 3.1 |
| TS_WM6 | 38.4 | 77.1 | 10.9 | 1.8 | -0.4 | 10.9 | 1.7 |
| 2H2O + HO2 | 36.2 | 144.7 | -33.6 | -24.9 | -24.7 | -33.6 | -27.1 |
| HO•••H2O + H2O2 | 37.4 | 124.5 | 0.0 | 0.0 | 0.0 | 0.0 | 0.0 |
| IM_WM7 | 40.3 | 86.7 | 4.0 | -5.5 | -7.3 | 4.0 | -4.3 |
| TS_WM7 | 38.2 | 76.1 | 20.9 | 8.5 | 6.5 | 20.9 | 7.5 |
| (H2O)2•••HO2 | 41.4 | 84.1 | -32.7 | -44.6 | -41.9 | -32.7 | -42.2 |
| IM_WM8 | 40.0 | 88.7 | 5.8 | -3.1 | -1.9 | 5.8 | -2.6 |
| TS_WM8 | 37.3 | 85.3 | 9.0 | 2.1 | 0.2 | 9.0 | 0.2 |
| 2H2O + HO2 | 36.2 | 144.7 | -33.6 | -24.9 | -24.7 | -33.6 | -24.7 |

*a* ZPE and *S* values obtained at M06-2X/aug-cc-pVTZ level of theory; The energy values are obtained at CCSD(T)/CBS level whereas the *H* and *G* corrections are taken from the M06-2X/aug-cc-pVTZ level.

**Table** **S5** Zero point energy (ZPE/(kcalmol-1)), entropies (S/ (cal·mol-1·K-1)), relative energies (Δ*E* and Δ(*E+*ZPE)/(kcalmol-1)), enthalpies (Δ*H*(298)/(kcalmol-1)), and free energies (Δ*G*(298)/(kcalmol-1)) for water dimer-assisted H2O2 + HO → HO2 + H2O reaction

| Species | ZPE | *S* | △*E* | △*H* | △*G* | △(*E* + ZPE) |
| --- | --- | --- | --- | --- | --- | --- |
| H2O2•••(H2O)2 + HO | 54.5 | 128.4 | 0.0 | 0.0 | 0.0 | 0.0 |
| IM_WD1 | 57.3 | 96.4 | -8.8 | -6.4 | 2.6 | -6.0 |
| TS_WD1 | 54.0 | 94.3 | -1.0 | -2.0 | 7.6 | -1.4 |
| IMF_WD1 | 57.2 | 98.7 | -44.6 | -41.2 | -32.9 | -41.8 |
| H2O2•••(H2O)2+H2O | 55.1 | 128.3 | -34.9 | -33.0 | -33.6 | -34.3 |
| IM_WD2 | 57.3 | 96.4 | -8.9 | -6.0 | 2.6 | -6.1 |
| IM_WD3 | 55.2 | 96.5 | -4.6 | -3.8 | 4.6 | -3.9 |
| TS_WD2 | 54.2 | 94.1 | 2.8 | 1.3 | 10.0 | 2.5 |
| TS_WD3 | 52.6 | 98.5 | 1.3 | -0.4 | 7.5 | -0.6 |
| HO2•••(H2O)3 | 56.9 | 100.6 | -43.6 | -40.9 | -33.3 | -41.1 |
| 3H2O + HO2 | 49.8 | 189.8 | -15.2 | -17.6 | -34.3 | -19.9 |
| HOOH•••(H2O)2 + HO | 54.6 | 128.3 | 0.0 | 0.0 | 0.0 | 0.0 |
| IM_WD4 | 55.9 | 100.0 | -5.9 | -5.7 | 2.7 | -4.6 |
| TS_WD4 | 53.2 | 97.1 | 1.2 | -1.2 | 8.1 | -0.1 |
| IMF_WD4 | 57.3 | 102.2 | -41.1 | -38.9 | -31.1 | -38.4 |
| HO2•••(H2O)2 + H2O | 55.1 | 128.3 | -37.0 | -35.7 | -35.7 | -36.5 |
| HO•••(H2O)2 + H2O2 | 0.0 | 135.9 | 0.0 | 0.0 | 0.0 | 0.0 |
| IM_WD5 | -5.1 | 100.0 | -7.2 | -5.8 | 4.9 | -5.5 |
| TS_WD5 | -0.4 | 97.1 | 1.3 | -1.2 | 10.3 | 0.3 |
| IMF_WD5 | -38.6 | 102.2 | -41.7 | -39.0 | -29.0 | -38.7 |
| (H2O)3 + HO2 | -30.7 | 134.3 | -31.8 | -30.8 | -30.3 | -30.9 |

*a* ZPE and *S* values obtained at M06-2X/aug-cc-pVTZ level of theory; The energy values are obtained at CCSD(T)/CBS level whereas the *H* and *G* corrections are taken from the M06-2X/aug-cc-pVTZ level.

**Table S6** Zero point energy (ZPE/(kcalmol-1)), entropies (S/ (cal·mol-1·K-1)), relative energies (Δ*E* and Δ(*E +* ZPE)/(kcalmol-1)), enthalpies (Δ*H*(298)/(kcalmol-1)), and free energies (Δ*G*(298)/(kcalmol-1)) for water trimer-assisted H2O2 + HO → HO2 + H2O reaction

| Species | ZPE | S | △*E* | △*H* | △*G* | △(*E* + ZPE) |
| --- | --- | --- | --- | --- | --- | --- |
| H2O2•••(H2O)3 + HO | 69.3 | 143.5 | 0.0 | 0.0 | 0.0 | 0.0 |
| IM_WT1 | 72.6 | 111.9 | -8.5 | -6.1 | 3.4 | -5.2 |
| TS_WT1 | 69.5 | 109.9 | -0.8 | -1.4 | 8.6 | -0.6 |
| IMF_WT1 | 72.5 | 112.2 | -37.8 | -35.3 | -26.0 | -34.5 |
| H2O2•••(H2O)3 + H2O | 70.5 | 145.7 | -33.4 | -32.0 | -32.7 | -32.2 |
| IM_WT2 | 72.3 | 101.5 | -8.5 | -7.9 | 4.6 | -5.5 |
| IM_WT3 | 70.9 | 108.6 | -7.8 | -7.6 | 2.8 | -6.1 |
| TS_WT2 | 72.2 | 115.9 | -2.3 | 0.3 | 8.5 | 0.6 |
| TS_WT3 | 68.2 | 115.5 | 2.2 | 0.7 | 9.1 | 1.1 |
| IMF_WT3 | 72.5 | 117.6 | -41.3 | -38.3 | -30.6 | -38.0 |

*a* ZPE and *S* values obtained at M06-2X/aug-cc-pVTZ level of theory; The energy values are obtained at CCSD(T)/CBS level whereas the *H* and *G* corrections are taken from the M06-2X/aug-cc-pVTZ level.

Reference

1. A. B. Vakhtin, D. C. McCabe, A. R. Ravishankara and S. R. Leone, J. Phys. Chem. A., **107**, 10642 (2003).

2. P. H. Wine, D. H. Semmes and A. R. Ravishankara, J. Chem. Phys., **75**, 4390 (1981).

3. R. J. Buszek, M. Torrent-Sucarrat, J. M. Anglada and J. S. Francisco, J. Phys. Chem. A., **116**, 5821 (2012).

1.  Corresponding authors. Tel: +86-0916-2641083, Fax: +86-0916-2641083.

   E-mail: ztianlei88@l63.com (T. L. Zhang); [↑](#footnote-ref-2)
